# INFOGRAPHICS IN ANESTHESIOLOGY

Complex Information for Anesthesiologists Presented Quickly and Clearly

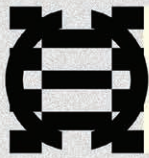

## Anesthesia Clinical Practice Guidelines: A View through the Kaleidoscope

In this issue, Laserna *et al.*<sup>1</sup> reviewed 60 anesthesia clinical practice guidelines from 2010 to 2020, extracting **2,280** recommendations. The level of evidence was determined for each using the ACC/AHA or GRADE system.

### LEVEL of EVIDENCE

**Level A** – Data from multiple randomized clinical trials

**Level B** – Data from single RCT or nonrandomized trial

**Level C** – Expert opinion, case series or case reports

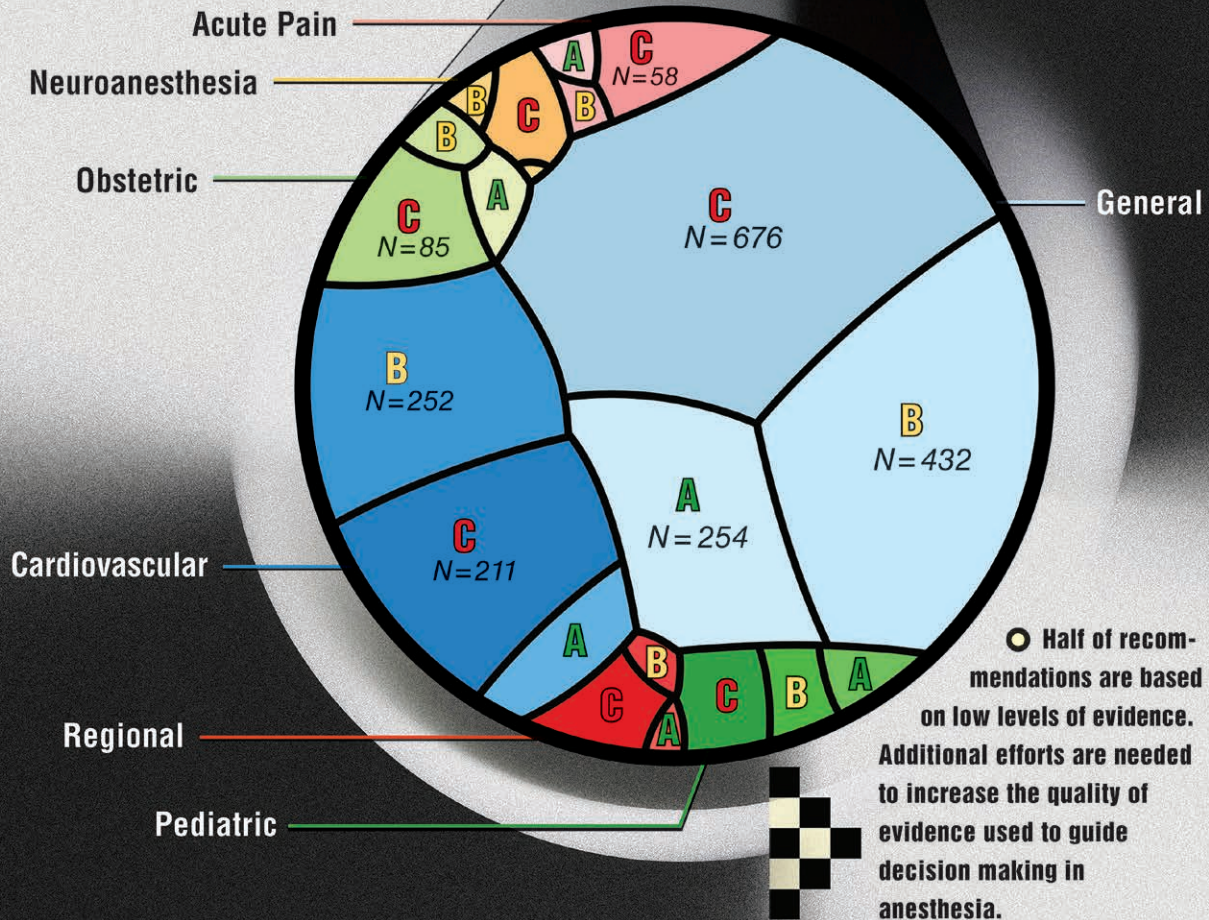

ACC/AHA, American College of Cardiology/American Heart Association classification system; GRADE, Grading of Recommendations Assessment, Development, and Evaluation system; RCT, randomized controlled trial.

Infographic created by Jonathan P. Wanderer, Vanderbilt University Medical Center, and James P. Rathmell, Brigham and Women's Health Care/Harvard Medical School. Illustration by Annemarie Johnson, Vivo Visuals. Address correspondence to Dr. Wanderer: jon.wanderer@vumc.org.

1. Laserna A, Rubinger DA, Barahona-Correa JE, Wright N, Williams MR, Wyrobek JA, Hasman L, Lustik SJ, Eaton MP, Glance LG. Levels of evidence supporting the North American and European perioperative care guidelines for anesthesiologists between 2010 and 2020: A systematic review. *ANESTHESIOLOGY* 2021; 135:31–56
